# Supplementary material for: Higher Serum 25-Hydroxyvitamin D Is Associated with Lower All-Cause and Cardiovascular Mortality among US Adults with Nonalcoholic Fatty Liver Disease
Source: MDPI journal article supplement (doi:10.3390/nu14194013), 2022-09-27
Supplement: s1 [file s1]

**Supplementary Table S1. Methods and regression equations for plasm glucose in NHANES cycles, 2001-2016**

| Survey cycles | Method                                                                                                                                                                            | Backward regression equations                                               |
|---------------|-----------------------------------------------------------------------------------------------------------------------------------------------------------------------------------|-----------------------------------------------------------------------------|
| 2015-2016     | Hexokinase method using a Roche/Hitachi Cobas C311 Chemistry Analyzer (Roche Diagnostics, Indianapolis, IN), University of Missouri-Columbia, Columbia, MO [1]                    | To compare 2015-2016 data (X) and 2013-2014 data (Y):<br>$Y=1.023*X-0.5108$ |
| 2013-2014     | Hexokinase method using a Roche/Hitachi Cobas C501 Chemistry Analyzer (Roche Diagnostics, Indianapolis, IN), University of Missouri-Columbia, Columbia, MO [2]                    | Assumed comparable to 2007-2012 data                                        |
| 2007-2012     | Hexokinase method using a Roche/Hitachi Modular P Chemistry Analyzer (Roche Diagnostics, Indianapolis, IN), University of Minnesota, Minneapolis, MN [3]                          | To compare 2007-2014 data (X) and 2005-2006 data (Y):<br>$Y=X-1.139$        |
| 2005-2006     | Hexokinase method using a Roche/Hitachi 911 Analyzer (Roche Diagnostics, Indianapolis, IN), University of Minnesota, Minneapolis, MN [4]                                          | To compare 2005-2006 data (X) and 2001-2004 data (Y):<br>$Y=0.9835*X$       |
| 2001-2004     | Modified hexokinase enzymatic method using a Roche Cobas Mira Chemistry System (Roche Diagnostic Systems, Inc., Montclair, NJ), University of Missouri-Columbia, Columbia, MO [5] | -                                                                           |

**Supplementary Table S2. Methods and regression equations for serum insulin in NHANES cycles, 2001-2016**

| Survey cycles | Method                                                                                                                                                              | Backward regression equations                                                                     |
|---------------|---------------------------------------------------------------------------------------------------------------------------------------------------------------------|---------------------------------------------------------------------------------------------------|
| 2013-2016     | Two-site immunoenzymometric assay, AIA-PACK IRI (Tosoh AIA-900 Chemistry Analyzer, Inc., San Francisco, CA), University of Missouri-Columbia, Columbia, MO [6]      | To compare 2013-2016 data (X) and 2009-2012 data (Y):<br>$Y=10^{(0.9765*\log_{10}(X) + 0.07832)}$ |
| 2011-2012     | Chemiluminescent immunoassay, Elecsys 2010 analyzer (Roche Diagnostics, Indianapolis, IN), University of Minnesota, Minneapolis, MN [7]                             | To compare 2011-2012 data (X) and 2005-2010 data (Y):<br>$Y=0.6295+1.0770*X-0.0008566*X^2$        |
| 2005-2010     | Merocodia Insulin ELISA (Merocodia AB, Uppsala, Sweden), University of Minnesota, Minneapolis, MN [8]                                                               | To compare 2005-2010 data (X) and 2003-2004 data (Y):<br>$Y=1.0526*X-1.5674$                      |
| 2003-2004     | Two-site immunoenzymometric assay, AIA-PACK IRI (Tosoh Medics, Inc., San Francisco, CA), University of Missouri-Columbia, Columbia, MO [9]                          | To compare 2003-2004 (X) and 2001-2002 data (Y):<br>$Y=0.96006*X+3.23663$                         |
| 2001-2002     | Radioimmunoassay, Berthold Models LB2111 and LB2104 Multi-Crystal Gamma Counter (Wallac Inc., Gaithersburg, MD), University of Missouri-Columbia, Columbia, MO [10] | -                                                                                                 |

**References**

1. NCHS. NHANES 2015-2016 Laboratory Procedure Manual - Fasting Glucose. Accessed June 2022. [https://wwwn.cdc.gov/nchs/data/nhanes/2015-2016/labmethods/GLU\\_I\\_MET\\_C311.pdf](https://wwwn.cdc.gov/nchs/data/nhanes/2015-2016/labmethods/GLU_I_MET_C311.pdf)
2. NCHS. NHANES 2013-2014 Laboratory Procedure Manual - Fasting Glucose. Accessed June 2022. [https://wwwn.cdc.gov/nchs/data/nhanes/2013-2014/labmethods/GLU\\_H\\_MET\\_Fasting\\_Glucose.pdf](https://wwwn.cdc.gov/nchs/data/nhanes/2013-2014/labmethods/GLU_H_MET_Fasting_Glucose.pdf)
3. NCHS. NHANES 2007-2008 Laboratory Procedure Manual - Fasting Glucose. Accessed June 2022. [http://www.cdc.gov/nchs/data/nhanes/nhanes\\_07\\_08/glu\\_e\\_met\\_fasting\\_glucose\\_ModP.pdf](http://www.cdc.gov/nchs/data/nhanes/nhanes_07_08/glu_e_met_fasting_glucose_ModP.pdf)

4. NCHS. NHANES 2005-2006 Laboratory Procedure Manual - Plasma Fasting Glucose. Accessed June 2022.  
[http://www.cdc.gov/nchs/data/nhanes/nhanes\\_05\\_06/glu\\_d\\_met\\_fasting\\_glucose.pdf](http://www.cdc.gov/nchs/data/nhanes/nhanes_05_06/glu_d_met_fasting_glucose.pdf)
5. NCHS. NHANES 2003-2004 Laboratory Procedure Manual - Plasma Fasting Glucose. Accessed June 2022.  
[https://www.cdc.gov/nchs/data/nhanes/nhanes\\_03\\_04/l10am\\_c\\_met\\_glucose.pdf](https://www.cdc.gov/nchs/data/nhanes/nhanes_03_04/l10am_c_met_glucose.pdf)
6. NCHS. NHANES 2015-2016 Laboratory Procedure Manual - Insulin. Accessed June 2022.  
[https://wwwn.cdc.gov/nchs/data/nhanes/2015-2016/labmethods/INS\\_I\\_MET.pdf](https://wwwn.cdc.gov/nchs/data/nhanes/2015-2016/labmethods/INS_I_MET.pdf)
7. NCHS. NHANES 2009-2010 Laboratory Procedure Manual - Insulin. Accessed June 2022.  
[http://www.cdc.gov/NCHS/data/nhanes/nhanes\\_09\\_10/INS\\_F\\_met\\_insulin.pdf](http://www.cdc.gov/NCHS/data/nhanes/nhanes_09_10/INS_F_met_insulin.pdf)
8. NCHS. NHANES 2005-2006 Laboratory Procedure Manual - Insulin. Accessed June 2022.  
[http://www.cdc.gov/nchs/data/nhanes/nhanes\\_05\\_06/glu\\_d\\_met\\_insulin.pdf](http://www.cdc.gov/nchs/data/nhanes/nhanes_05_06/glu_d_met_insulin.pdf)
9. NCHS. NHANES 2003-2004 Laboratory Procedure Manual - Lab 10AM - Insulin. Accessed June 2022.  
[http://www.cdc.gov/nchs/data/nhanes/nhanes\\_03\\_04/l10am\\_c\\_met\\_insulin.pdf](http://www.cdc.gov/nchs/data/nhanes/nhanes_03_04/l10am_c_met_insulin.pdf)
10. NCHS. NHANES 1999-2000 Laboratory Procedure Manual - Lab 10AM - Insulin. Accessed June 2022.  
[http://www.cdc.gov/nchs/data/nhanes/nhanes\\_99\\_00/lab10am\\_met\\_insulin.pdf](http://www.cdc.gov/nchs/data/nhanes/nhanes_99_00/lab10am_met_insulin.pdf)

**Supplementary Table S3. Baseline characteristics of individuals based on the presence of NAFLD in NHANES, 2001–2016**

| Characteristics                    | Total<br>(N =11,029) | NAFLD<br>(N =4512) | No NAFLD<br>(N =6517) | <i>P</i> value |
|------------------------------------|----------------------|--------------------|-----------------------|----------------|
| Age (years)                        | 50.27±0.29           | 54.12±0.29         | 47.83±0.37            | <0.001         |
| Sex, n (%)                         |                      |                    |                       | <0.001         |
| Male                               | 5379 (50.91)         | 2452 (56.77)       | 2927 (44.21)          |                |
| Female                             | 5650 (49.09)         | 2060 (43.23)       | 3590 (55.79)          |                |
| Race/ethnicity, n (%)              |                      |                    |                       | <0.001         |
| Non-Hispanic White                 | 5199 (69.44)         | 2189 (72.03)       | 3010 (67.80)          |                |
| Non-Hispanic Black                 | 2117 (11.21)         | 508 (6.55)         | 1609 (14.16)          |                |
| Mexican American                   | 1730 (7.04)          | 1042 (10.21)       | 688 (5.03)            |                |
| Others                             | 1983 (12.31)         | 773 (11.20)        | 1210 (13.01)          |                |
| Smoking status, n (%)              |                      |                    |                       | <0.001         |
| Never                              | 6527 (59.83)         | 2495 (55.06)       | 4032 (62.89)          |                |
| Former                             | 2897 (25.41)         | 1428 (31.40)       | 1469 (21.63)          |                |
| Current                            | 1595 (14.69)         | 585 (13.47)        | 1010 (15.47)          |                |
| Education level, n (%)             |                      |                    |                       | <0.001         |
| Less than high school              | 2934 (17.63)         | 1466 (21.53)       | 1468 (15.16)          |                |
| High school or equivalent          | 2437 (22.52)         | 1023 (24.19)       | 1414 (21.46)          |                |
| College or above                   | 5649 (59.82)         | 2019 (54.23)       | 3630 (63.38)          |                |
| Family poverty income ratio, n (%) |                      |                    |                       | <0.001         |
| <1.0                               | 1945 (12.21)         | 865 (12.62)        | 1080 (11.96)          |                |
| ≥1.0 & <3.0                        | 4246 (33.33)         | 1825 (35.72)       | 2421 (31.81)          |                |
| ≥3.0                               | 3996 (48.15)         | 1453 (44.97)       | 2543 (50.17)          |                |
| Unknown                            | 842 (6.31)           | 369 (6.68)         | 473 (6.06)            |                |
| Physical activity, n (%)           |                      |                    |                       | <0.001         |

|                                               |              |              |              |        |
|-----------------------------------------------|--------------|--------------|--------------|--------|
| Sedentary                                     | 3066 (23.04) | 1479 (28.28) | 1587 (19.72) | <0.001 |
| Insufficient                                  | 2345 (22.45) | 913 (21.07)  | 1432 (23.32) |        |
| Moderate                                      | 1384 (13.28) | 527 (12.68)  | 857 (13.66)  |        |
| High                                          | 4234 (41.23) | 1593 (37.97) | 2641 (43.30) |        |
| BMI (kg/m <sup>2</sup> ), n (%)               |              |              |              | <0.001 |
| <25.0                                         | 3221 (30.09) | 291 (5.06)   | 2930 (46.05) |        |
| 25.0–29.9                                     | 3727 (33.64) | 1346 (28.18) | 2381 (37.16) |        |
| ≥30.0                                         | 4026 (35.69) | 2839 (66.22) | 1187 (16.79) |        |
| Diabetes, n (%)                               | 2116 (14.77) | 1526 (28.31) | 590 (6.18)   | <0.001 |
| Hypertension, n (%)                           | 5161 (41.34) | 2745 (58.58) | 2416 (30.40) | <0.001 |
| Hyperlipidemia, n (%)                         | 8344 (74.41) | 3970 (88.12) | 4374 (65.72) | <0.001 |
| CVD, n (%)                                    | 1435 (10.62) | 815 (16.18)  | 620 (7.10)   | 0.03   |
| Steroid use, n (%)                            | 172 (1.44)   | 84 (1.57)    | 88 (1.36)    | 0.43   |
| eGFR (mL/min/1.73 m <sup>2</sup> )            | 91.86±0.38   | 88.32±0.42   | 94.11±0.48   | <0.001 |
| Waist circumference (cm)                      | 99.27±0.25   | 112.12±0.32  | 91.12±0.22   | <0.001 |
| Total cholesterol (mg/dL)                     | 195.04±0.54  | 195.48±0.89  | 194.76±0.67  | 0.51   |
| Low-density lipoprotein cholesterol (mg/dL)   | 115.97±0.45  | 115.43±0.74  | 116.30±0.55  | 0.34   |
| High-density lipoprotein cholesterol; (mg/dL) | 53.21±0.21   | 46.52±0.21   | 57.46±0.27   | <0.001 |
| Fasting triglyceride (mg/dL)                  | 132.10±1.40  | 173.24±2.91  | 106.00±1.33  | <0.001 |
| Fasting glucose (mg/dL)                       | 105.98±0.38  | 118.74±0.77  | 97.89±0.27   | <0.001 |
| Fasting insulin (pmol/L)                      | 12.63±0.18   | 20.87±0.35   | 7.40±0.07    | <0.001 |
| Glycosylated Hemoglobin, Type A1C (%)         | 5.65±0.01    | 5.99±0.02    | 5.43±0.01    | <0.001 |
| Gamma-glutamyltransferase (U/L)               | 25.66±0.27   | 36.98±0.61   | 18.47±0.16   | <0.001 |
| 25(OH)D (nmol/L)                              | 67.70±0.54   | 64.35±0.67   | 69.83±0.63   | <0.001 |

Data are presented as weighted means ± SEs for continuous variables and unweighted numbers (weighted percentages) for categorical variables.

Abbreviations: NAFLD, nonalcoholic fatty liver disease; NHANES, National Health and Nutrition Examination Survey; BMI, body mass index; CVD, cardiovascular disease; eGFR, estimated glomerular filtration rate.

**Supplementary Table S4. Sensitivity analyses of the associations (HRs, 95% CIs) between serum 25(OH)D concentrations and all-cause and cardiovascular mortality among patients with NAFLD in NHANES, 2001–2016**

| Analysis                                                                            | Serum 25(OH)D concentrations (nmol/l) |                   |                   |                   | <i>P</i><br>trend |
|-------------------------------------------------------------------------------------|---------------------------------------|-------------------|-------------------|-------------------|-------------------|
|                                                                                     | <25.0                                 | 25.0–49.9         | 50.0–74.9         | ≥75.0             |                   |
| Further adjustment of months when blood was drawn (N=4512)                          |                                       |                   |                   |                   |                   |
| All-cause mortality                                                                 | 1.00                                  | 0.56 (0.36, 0.87) | 0.40 (0.25, 0.64) | 0.37 (0.23, 0.59) | <0.001            |
| Cardiovascular mortality                                                            | 1.00                                  | 0.28 (0.15, 0.50) | 0.16 (0.09, 0.31) | 0.14 (0.07, 0.28) | <0.001            |
| Further adjustment of HEI-2015 (in tertiles) (N=3958)                               |                                       |                   |                   |                   |                   |
| All-cause mortality                                                                 | 1.00                                  | 0.51 (0.32, 0.81) | 0.38 (0.23, 0.62) | 0.32 (0.20, 0.53) | <0.001            |
| Cardiovascular mortality                                                            | 1.00                                  | 0.24 (0.13, 0.45) | 0.17 (0.09, 0.33) | 0.14 (0.07, 0.28) | <0.001            |
| Excluding non-Hispanic Black participants (N=4004)                                  |                                       |                   |                   |                   |                   |
| All-cause mortality                                                                 | 1.00                                  | 0.54 (0.32, 0.91) | 0.39 (0.22, 0.66) | 0.35 (0.20, 0.60) | <0.001            |
| Cardiovascular mortality                                                            | 1.00                                  | 0.24 (0.13, 0.46) | 0.14 (0.07, 0.29) | 0.13 (0.06, 0.26) | <0.001            |
| Excluding participants who died within two years of follow-up (N=4406)              |                                       |                   |                   |                   |                   |
| All-cause mortality                                                                 | 1.00                                  | 0.53 (0.33, 0.86) | 0.37 (0.22, 0.61) | 0.36 (0.22, 0.60) | 0.004             |
| Cardiovascular mortality                                                            | 1.00                                  | 0.30 (0.15, 0.57) | 0.15 (0.07, 0.31) | 0.13 (0.06, 0.29) | <0.001            |
| Excluding participants with missing data on family income to poverty ratio (N=4143) |                                       |                   |                   |                   |                   |
| All-cause mortality                                                                 | 1.00                                  | 0.56 (0.35, 0.92) | 0.40 (0.24, 0.66) | 0.37 (0.22, 0.61) | <0.001            |
| Cardiovascular mortality                                                            | 1.00                                  | 0.30 (0.15, 0.60) | 0.18 (0.09, 0.37) | 0.15 (0.07, 0.32) | <0.001            |

All the models adjusted for age, sex, race/ethnicity, education level, PIR, smoking status, BMI, physical activity, diabetes, hypertension, dyslipidemia, CVD, eGFR, and steroid use.

Abbreviations: HRs, hazard ratios; CIs, confidence intervals; NAFLD, nonalcoholic fatty liver disease; NHANES, National Health and Nutrition Examination Survey; PIR, family poverty income ratio; BMI, body mass index; CVD, cardiovascular disease; eGFR, estimated glomerular filtration rate.

**Supplementary Table S5. Sensitivity analysis of the associations (HRs, 95% CIs) between serum 25(OH)D concentrations and all-cause and cardiovascular mortality among patients with NAFLD of different ethnic groups in NHANES, 2001–2016**

|                             | Quartiles of serum 25(OH)D concentrations (nmol/l) |                   |                   |                   | <i>P</i> trend |
|-----------------------------|----------------------------------------------------|-------------------|-------------------|-------------------|----------------|
|                             | <44.7                                              | 44.7–59.3         | 59.4–74.9         | ≥75.0             |                |
| Total participants (N=4512) |                                                    |                   |                   |                   |                |
| All-cause mortality         | 1.00                                               | 0.77 (0.58, 1.03) | 0.69 (0.53, 0.89) | 0.63 (0.48, 0.82) | 0.001          |
| Cardiovascular mortality    | 1.00                                               | 0.55 (0.31, 0.95) | 0.47 (0.29, 0.77) | 0.41 (0.27, 0.64) | <0.001         |
| Non-Hispanic White (N=2189) | <53.3                                              | 53.3–66.1         | 66.2–80.6         | ≥80.7             |                |
| All-cause mortality         | 1.00                                               | 0.73 (0.56, 0.95) | 0.65 (0.48, 0.88) | 0.63 (0.48, 0.84) | 0.003          |
| Cardiovascular mortality    | 1.00                                               | 0.48 (0.28, 0.81) | 0.64 (0.38, 1.06) | 0.49 (0.32, 0.76) | 0.012          |
| Non-Hispanic Black (N=508)  | <30.5                                              | 30.6–42.5         | 42.6–60.3         | ≥60.4             |                |
| All-cause mortality         | 1.00                                               | 0.98 (0.46, 2.10) | 0.62 (0.29, 1.31) | 0.62 (0.32, 1.19) | 0.098          |
| Cardiovascular mortality    | 1.00                                               | 0.38 (0.08, 1.71) | 0.01 (0, 0.12)    | 0.41 (0.14, 1.27) | 0.083          |
| Other races (N=1815)        | <41.9                                              | 42.0–54.6         | 54.7–68.3         | ≥68.4             |                |
| All-cause mortality         | 1.00                                               | 0.97 (0.49, 1.91) | 0.81 (0.44, 1.49) | 0.89 (0.50, 1.59) | 0.636          |
| Cardiovascular mortality    | 1.00                                               | 1.01 (0.42, 2.43) | 0.41 (0.13, 1.28) | 0.63 (0.26, 1.49) | 0.204          |

All the models adjusted for age, sex, race/ethnicity, education level, PIR, smoking status, BMI, physical activity, diabetes, hypertension, dyslipidemia, CVD, eGFR, and steroid use.

Abbreviations: HRs, hazard ratios; CIs, confidence intervals; NAFLD, nonalcoholic fatty liver disease; NHANES, National Health and Nutrition Examination Survey; PIR, family poverty income ratio; BMI, body mass index; CVD, cardiovascular disease; eGFR, estimated glomerular filtration rate.



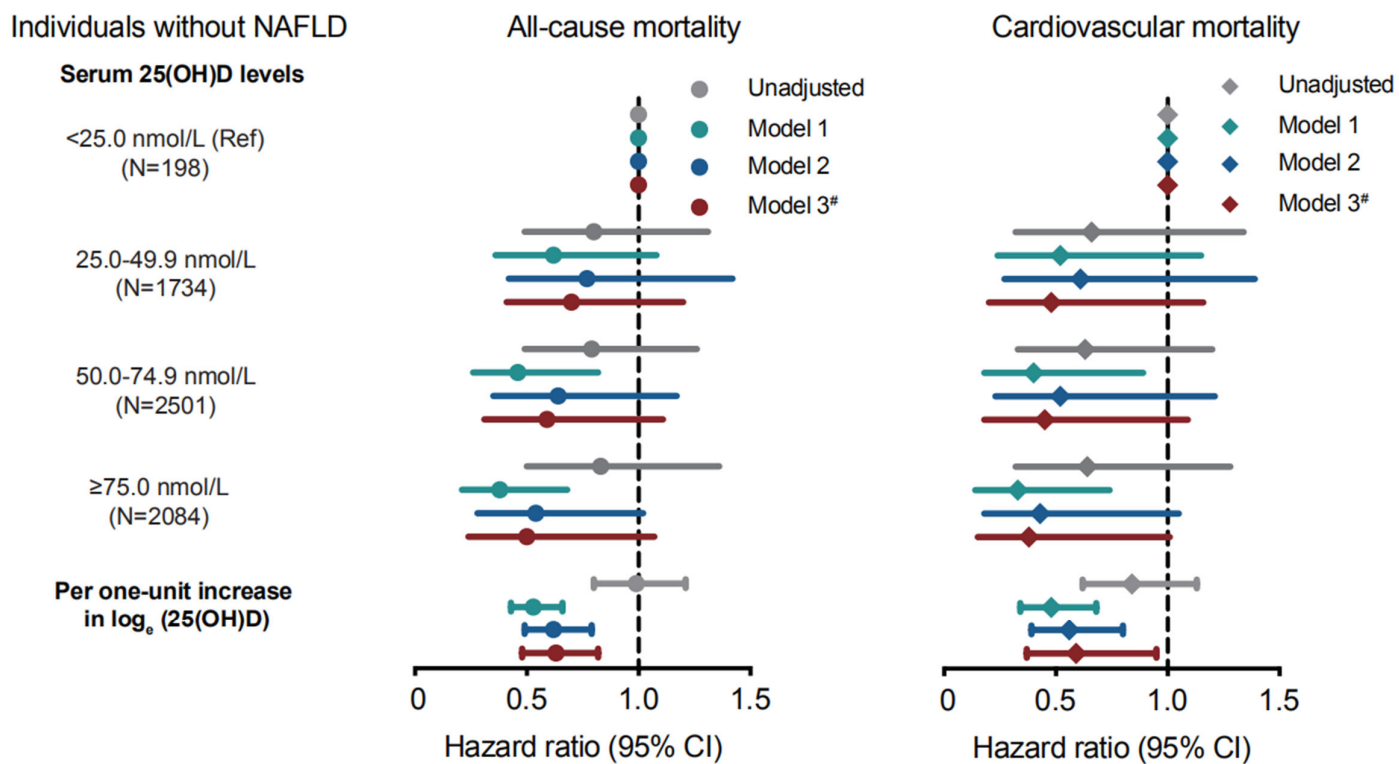

**Supplementary Figure S1. HRs (95% CIs) for all-cause and cardiovascular mortality based on serum 25(OH)D levels among individuals without NAFLD in NHANES, 2001–2016.**

HRs are shown as dots and cyan diamonds and 95% CIs as horizontal lines for all-cause, and cardiovascular mortality, respectively.

Model 1: adjusted for age, sex, and race/ethnicity.

Model 2: further adjusted for all covariates in Model 1 and education level, PIR, smoking status, physical activity, and BMI.

Model 3 (fully adjusted model): further adjusted for all covariates in Model 2 and hypertension, diabetes, hyperlipidemia, CVD, eGFR, and steroid use.

#All the 95% CIs from Model 3 were adjusted using Hochberg step-up procedure.

Abbreviations: HRs, hazard ratios; CIs, confidence intervals; NAFLD, nonalcoholic fatty liver disease; NHANES, National Health and Nutrition Examination Survey; PIR, family poverty income ratio, BMI, body mass index; CVD, cardiovascular disease; eGFR, estimated glomerular filtration rate.
